# Supplementary material for: Characteristics of COVID-19 Patients Admitted to Intensive Care Unit in Multispecialty Hospital of Riyadh, Saudi Arabia: A Retrospective Study
Source: MDPI journal article supplement (doi:10.3390/healthcare11182500), 2023-09-08
Supplement: s1 [file s1]

# Characteristics of COVID-19 Patients Admitted to Intensive Care Unit in Multispecialty Hospital of Riyadh, Saudi Arabia: A retrospective study

Mansour Almuqbil<sup>1\*</sup>, Ali Ibrahim Almoteer<sup>2</sup>, Alwaleed Mohammed Suwayyid<sup>2</sup>, Abdulaziz Hussain Bakarman<sup>2</sup>, Raed Fawaz alrashed<sup>2</sup>, Majed Alrobish<sup>2</sup>, Fahad Alasalb<sup>2</sup>, Abdulaziz Abdulrahman Alhusaynan<sup>2</sup>, Mohammed Hadi Alnefaie<sup>2</sup>, Abdullah Saud Altayar<sup>2</sup>, Saad Ebrahim Alobid<sup>3</sup>, Moneer E. Almadani<sup>4</sup>, Ahmed Alshehri<sup>5</sup>, Adel Alghamdi<sup>6</sup>, Syed Mohammed Basheeruddin Asdaq<sup>7\*</sup>

<sup>1</sup>Department of Clinical Pharmacy, College of Pharmacy, King Saud University, Riyadh 11451, Saudi Arabia, [mmetwazi@ksu.edu.sa](mailto:mmetwazi@ksu.edu.sa) (M.A.)

<sup>2</sup>Department of Pharmacy Practice, College of Pharmacy, AlMaarefa University, Dairiyah, 13713, Riyadh, Saudi Arabia, [sasdaq@gmail.com](mailto:sasdaq@gmail.com) (S.M.B.A); [Aalmotair@ksu.edu.sa](mailto:Aalmotair@ksu.edu.sa) (A.I.A.); [Dr.alwaleedswayyid@gmail.com](mailto:Dr.alwaleedswayyid@gmail.com) (A.M.S); [Abdulazizh148@gmail.com](mailto:Abdulazizh148@gmail.com) (A.H.B); [Raed.f95@gmail.com](mailto:Raed.f95@gmail.com) (R.F.A); [171120154@student.mcst.edu.sa](mailto:171120154@student.mcst.edu.sa) (M.A); [161120124@student.mcst.edu.sa](mailto:161120124@student.mcst.edu.sa) (F.A); [Phd.az95@gmail.com](mailto:Phd.az95@gmail.com) (A.A.A); [bn.hadi@gmail.com](mailto:bn.hadi@gmail.com) (M. H.A); [oooatooo@hotmail.com](mailto:oooatooo@hotmail.com) (A.S.A).

<sup>3</sup>Department of Pharmacology and Toxicology, College of Pharmacy, King Saud University, Riyadh, Saudi Arabia. [saaalobaid@ksu.edu.sa](mailto:saaalobaid@ksu.edu.sa)

<sup>4</sup>Department of Clinical Medicine, College of Medicine, AlMaarefa University, Dairiyah, 13713, Riyadh, Saudi Arabia, [mmadani@mcst.edu.sa](mailto:mmadani@mcst.edu.sa)

<sup>5</sup>Department of Pharmacology, College of Clinical Pharmacy, Imam Abdulrahman Bin Faisal University, King Faisal Road, Dammam 31441, Saudi Arabia, [adalshehri@iau.edu.sa](mailto:adalshehri@iau.edu.sa)

<sup>6</sup>Department of Pharmaceutical Chemistry, Faculty of Clinical Pharmacy, Al Baha University, P.O. Box 1988 Al Baha, Saudi Arabia, [Al.alghamdi@bu.edu.sa](mailto:Al.alghamdi@bu.edu.sa)

<sup>7</sup>Department of Pharmacy Practice, College of Pharmacy, AlMaarefa University, Dairiyah, 13713, Riyadh, Saudi Arabia, [sasdaq@gmail.com](mailto:sasdaq@gmail.com) (SMBA),

\* Correspondence: [sasdaq@gmail.com](mailto:sasdaq@gmail.com)/[sasdag@mcst.edu.sa](mailto:sasdag@mcst.edu.sa) (SMBA); [mmetwazi@ksu.edu.sa](mailto:mmetwazi@ksu.edu.sa) (MA)

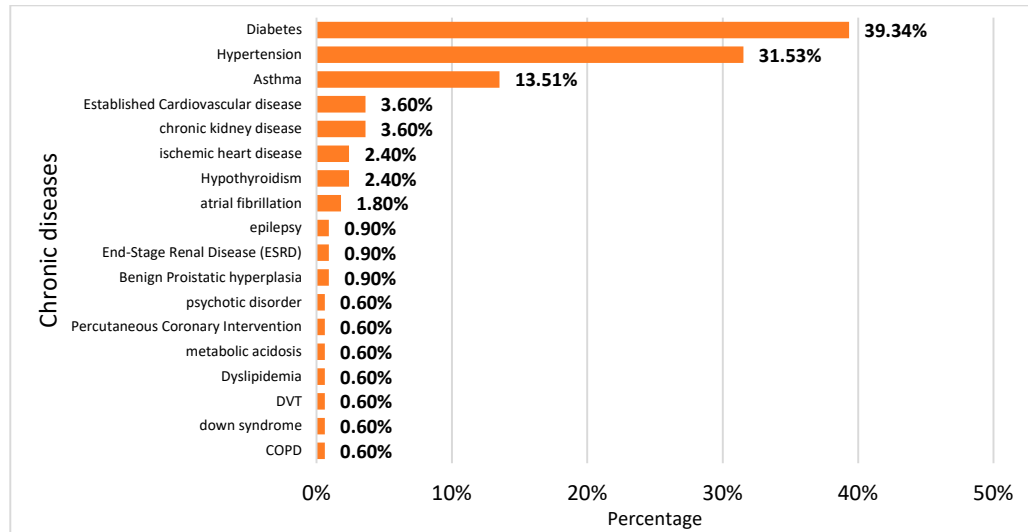

**Supplementary Figure S1.** Percentage distribution of chronic disease.

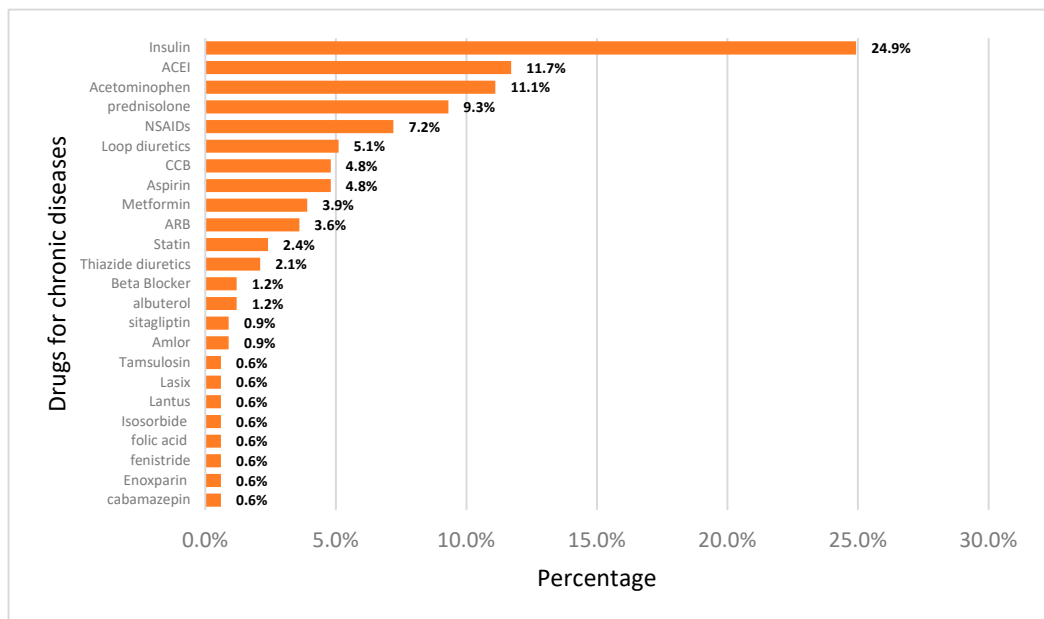

**Supplementary Figure S2.** Percentage distribution of drugs used for chronic diseases.

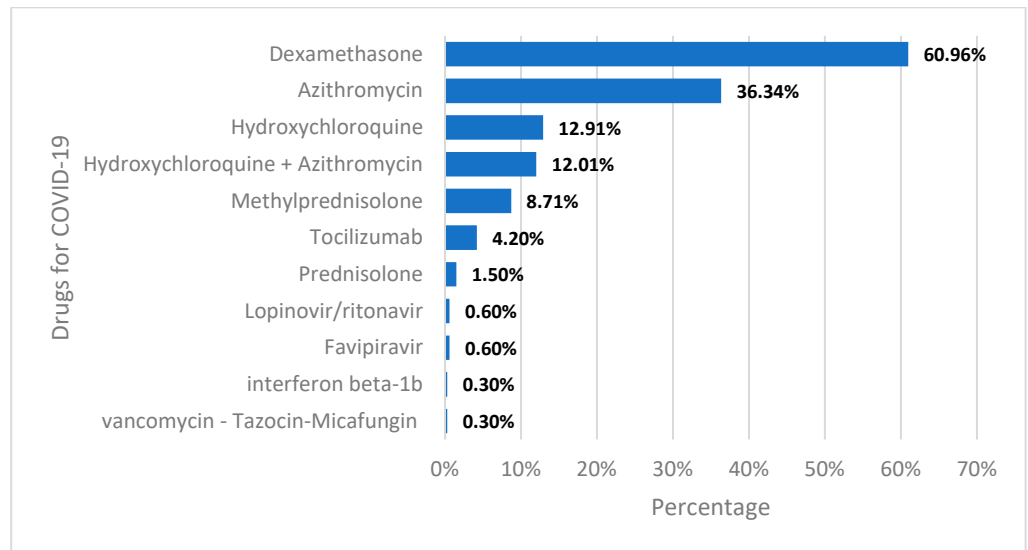

**Supplementary Figure S3.** Percentage distribution of drugs used for COVID-19.
